# Supplementary material for: A polythreading coordination array formed from a 3D microporous cation network and 1D anion ladders
Source: Royal Society of Chemistry journal article supplement (doi:10.1039/c2ce06397b), 2011-12-15
Supplement: c2ce06397b.pdf [file c2ce06397b.pdf]

## Supporting Materials

### A polythreading coordination array formed from 3D microporous porous network and 1D ladders†

Yan-Feng Cui, Xin Qian, Qian Chen, Bao-Long Li,\* and Hai-Yan Li

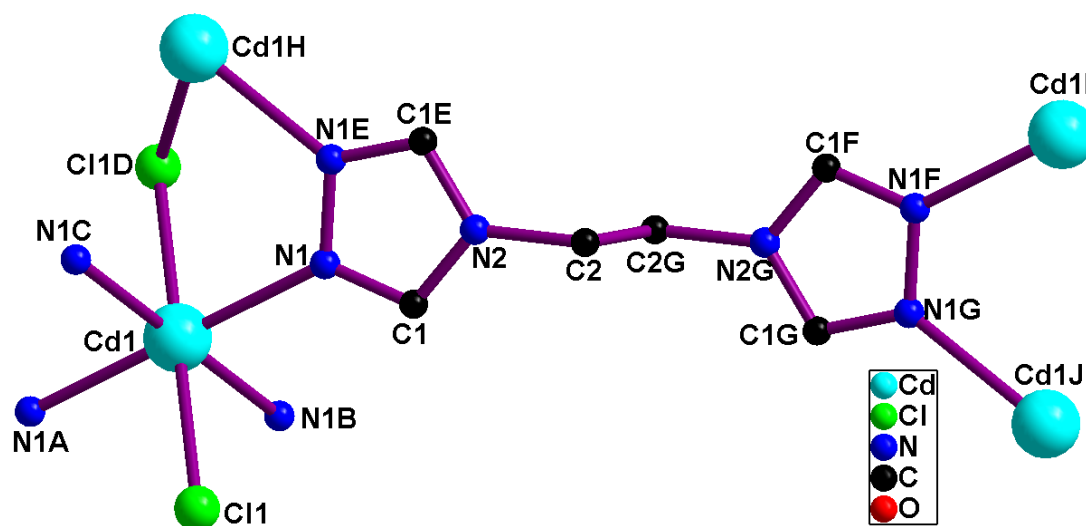

**Fig. S1** The coordination of the Cd(II) atom in **1**. Symmetry transformations used to generate equivalent atoms: A  $1.5-x, 0.5-y, 0.5-z$ ; B  $1.5-x, y, 0.5-z$ ; C  $x, 0.5-y, z$ ; D  $-0.5+x, 0.5-y, 0.5-z$ ; E  $1-x, y, z$ ; F  $1-x, -y, -z$ ; G  $x, -y, -z$ ; H  $1-x, 0.5-y, z$ ; I  $-0.5+x, -0.5+y, -0.5+z$ ; J  $1.5-x, -y, -0.5+z$ .

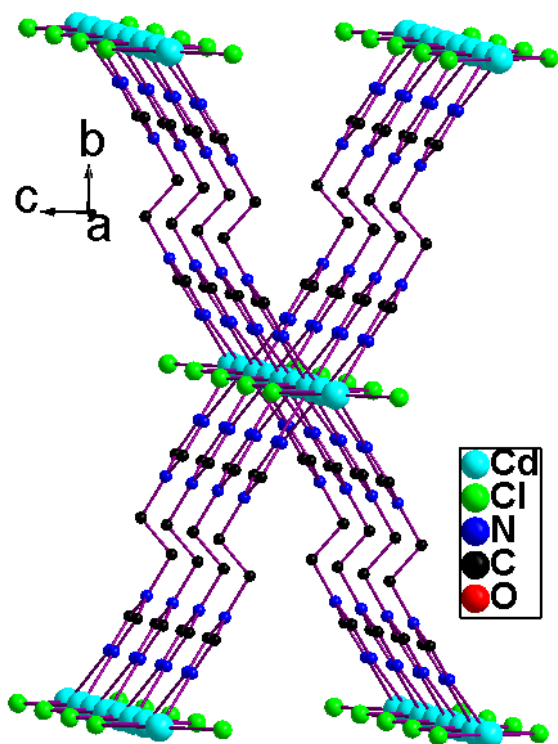

Fig. S2 One chain connects adjacent chains in **1** viewing along the *a* direction.

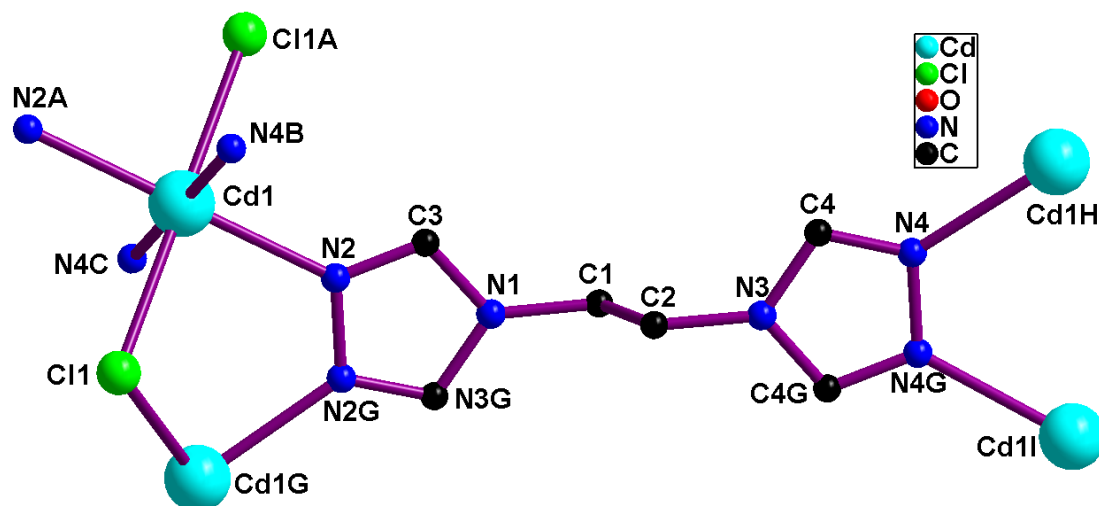

Fig. S3 The coordination environment of the Cd1 atom in **2**. Symmetry transformations used to generate equivalent atoms: A  $-x+1, -y+1, -z+1$ ; B  $-x+3/2, -y+1, z+1/2$ ; C  $x-1/2, y, -z+1/2$ ; G  $x, 0.5-y, z$ ; H  $1.5-x, 1-y, -0.5-z$ ; I  $0.5+x, 0.5-y, 0.5-z$ .

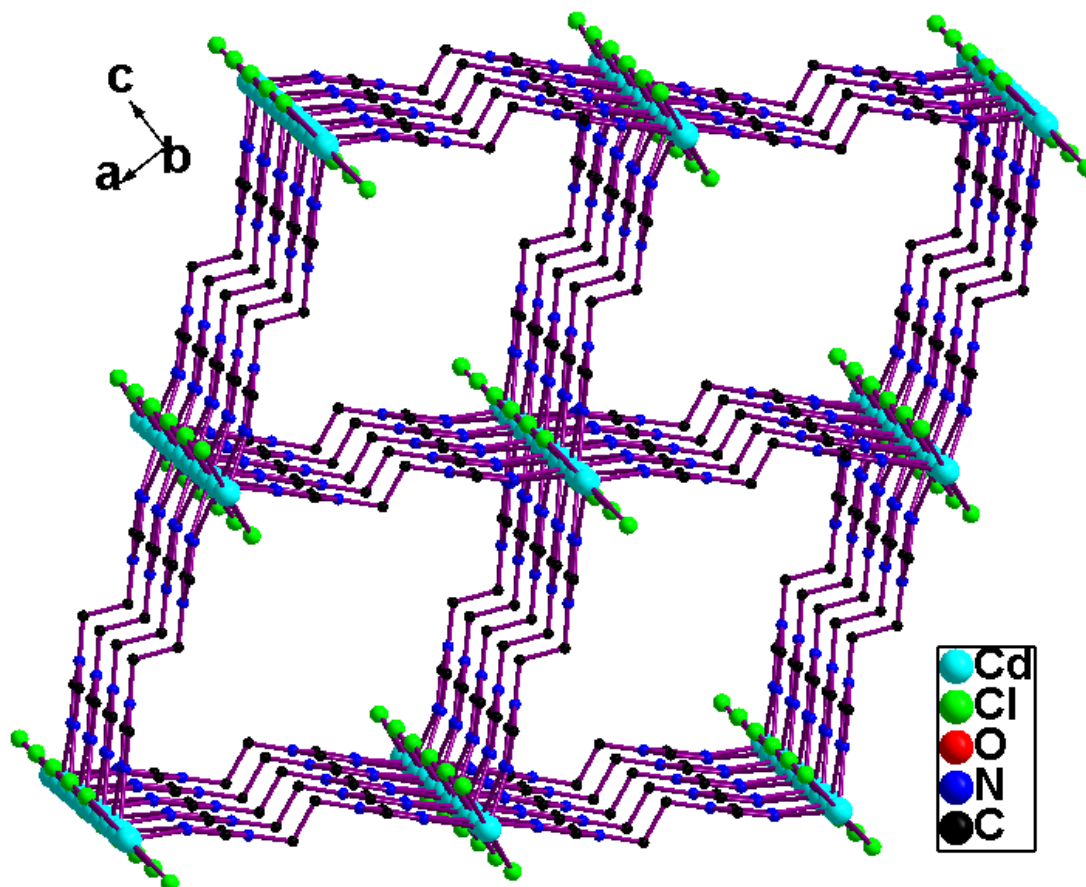

Fig . S4 The  $[\text{Cd}(\text{btre})\text{Cl}]_n^{n+}$  three-dimensional microporous cation network in 2.

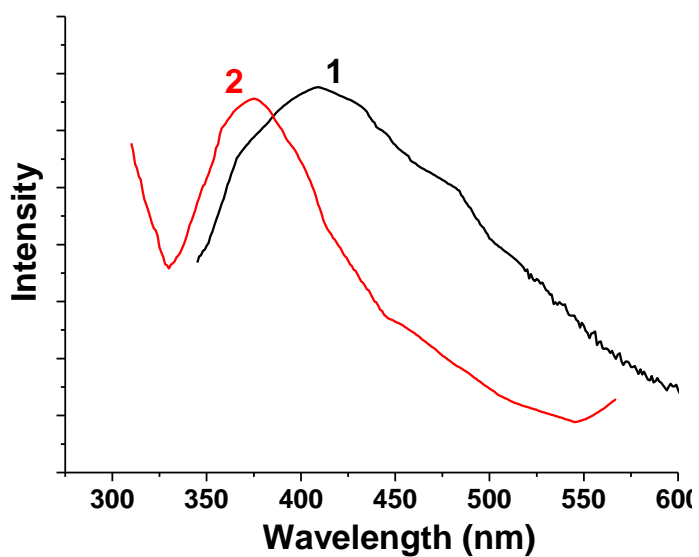

Fig. S5 Solid state emissions of 1 and 2.
